# Supplementary material for: Mammalian Models in Alzheimer’s Research: An Update
Source: Cells. 2023 Oct 16;12(20):2459. doi: 10.3390/cells12202459 (PMC10605533; doi:10.3390/cells12202459)
Supplement: Supplementary file 1 [file cells-12-02459-s001.zip › cells-2619619-supplementary.pdf]

**Supplementary Table S1: Transgenic mice models of Amyloid Pathology**

| <b>Model</b>   | <b>Mutation</b>                                      | <b>Model Background</b> | <b>A<math>\beta</math> Pathology</b> | <b>Disadvantages</b>                                                                          | <b>References</b> |
|----------------|------------------------------------------------------|-------------------------|--------------------------------------|-----------------------------------------------------------------------------------------------|-------------------|
| <b>Tg2576</b>  | APP KM670/671NL (Swedish)                            | C57BL/6 x SJL           | Plaques by 11-13 months              | Overexpression of multiple APP fragments                                                      | 27, 33-35, 168    |
| <b>PDAPP</b>   | APP V717F (Indiana)                                  | C57BL6 x DBA2           | Plaques at 6 months                  | Random integration of transgenes                                                              | 27,28,29,31,168   |
| <b>J20</b>     | APP K670_M671delinsNL (Swedish), APP V717F (Indiana) | C57BL/6                 | Plaques by 5-7 months                | Sudden death may occur (Tg2576)<br>A $\beta$ accumulation is preceded by cognitive impairment | 26, 45-48,168     |
| <b>TgCRND8</b> | APP K670_M671delinsNL (Swedish), APP V717F (Indiana) | Hybrid C3H/He-C57BL/6   | Plaques by 3 months                  | Genetic backgrounds mixed in some cases                                                       | 49-52, 168        |

|                               |                                                                                                       |                                                  |                                                                   |                                                                                                                       |             |
|-------------------------------|-------------------------------------------------------------------------------------------------------|--------------------------------------------------|-------------------------------------------------------------------|-----------------------------------------------------------------------------------------------------------------------|-------------|
| <b>5xFAD (B6SJL)</b>          | APP KM670/671NL (Swedish),<br>APP I716V (Florida), APP V717I<br>(London), PSEN1 M146L, PSEN1<br>L286V | C57BL/6 x SJL                                    | Plaques by 1.5 months                                             | Overexpression of multiple<br>APP fragments<br>No perfect negative control<br>Multiple mutations                      | 26,27,168   |
| <b>5xFAD (C57BL6)</b>         | APP KM670/671NL (Swedish),<br>APP I716V (Florida), APP V717I<br>(London), PSEN1 M146L, PSEN1<br>L286V | C57BL6                                           | Plaques by 1.5-2 months                                           | (APP+PS1)<br>Occurrence of non-specific<br>ER stress<br>No NFTs                                                       | 59,60,62,58 |
| <b>APPxPS1</b>                | APP K670_M671delinsNL<br>(Swedish) and PSEN1 L166P                                                    | C57BL/6                                          | Plaques by 1.5 months<br>(cortex) and 3-4 months<br>(hippocampus) | Cross breeding may be<br>complicated in some cases<br>Random integration of<br>transgenes                             | 63-67       |
| <b>TREM2- BAC x<br/>5xFAD</b> | APP KM670/671NL (Swedish),<br>APP I716V (Florida), APP V717I<br>(London), PSEN1 M146L, PSEN1<br>L286V | TREM2-BAC:<br>FVB/NJ;<br>5xFAD: C57BL/6 x<br>SJL | Plaques by 8.5 months                                             | No NFT or neuronal loss                                                                                               | 26,69-72    |
| <b>AppNL-F</b>                | APP KM670/671NL (Swedish),<br>APP I716F (Iberian)                                                     | C57BL/6                                          | Plaques by 6 months                                               | No NFT or neuronal loss<br>Multiple FAD mutations of<br>APP<br>Overproduction of CTF- $\beta$<br>Genomic homozygosity | 26,68,168   |
| <b>APPV717I</b>               | APP V717I (London)                                                                                    | C57BL/6 x FVB/N                                  | Plaques by 10 months                                              | No NFT observed                                                                                                       | 43,44       |

|                |                                                                            |         |                     |                 |          |
|----------------|----------------------------------------------------------------------------|---------|---------------------|-----------------|----------|
| <b>Tg-SwDI</b> | APP K670_M671delinsNL<br>(Swedish), APP E693Q (Dutch),<br>APP D694N (Iowa) | C57BL/6 | Plaques by 3 months | No NFT observed | 26,53,54 |
|----------------|----------------------------------------------------------------------------|---------|---------------------|-----------------|----------|

**Abbreviations:** A $\beta$  (amyloid-beta); NFT (Neurofibrillary Tangles); APP (Amyloid Precursor Protein); FAD (familial Alzheimer's Disease); CTF- $\beta$  (C-terminal fragment beta); ER (Endoplasmic Reticulum)

**Supplementary Table S2: Transgenic mice model of Tau pathology**

| <b>Model</b>           | <b>Mutation</b>                           | <b>Model Background</b>                                      | <b>Tau Pathology</b>                                                                                                         | <b>Disadvantages</b>                                                                                                                      | <b>References</b> |
|------------------------|-------------------------------------------|--------------------------------------------------------------|------------------------------------------------------------------------------------------------------------------------------|-------------------------------------------------------------------------------------------------------------------------------------------|-------------------|
| <b>JNPL3</b>           | MAPT P301L                                | C57BL/6, DBA/2, SW mixed background                          | NFTs develop from 4.5-6.5 months                                                                                             | Absence of amyloid pathology                                                                                                              | 82-85             |
| <b>hTau</b>            | M.A.P.T.: knock out; M.A.P.T.: Transgenic | Cross between SW and B6D2F1                                  | Hyperphosphorylated tau at 6 months                                                                                          | Absence of amyloid pathology                                                                                                              | 88-90,232         |
| <b>rTg (tau P301L)</b> | MAPT P301L                                | Produced by crossing 129S6 (activator) to F.V.B. (responder) | Pretangles at 2.5 months. Argyrophilic tangle-like inclusions in the cortex by 4 months and in the hippocampus by 5.5 months | No association found between genetic mutation and tau pathology in AD pateints<br><br>Overexpression of mutant human tau may attribute to | 26,88,89,97,232   |

|                          |            |                   |                          |                                                                                                        |            |
|--------------------------|------------|-------------------|--------------------------|--------------------------------------------------------------------------------------------------------|------------|
|                          |            |                   |                          | behavioral phenotypes and neuropathological deficits.<br>No amyloid pathology                          |            |
| <b>PS19 (tau P301S)-</b> | MAPT P301S | (C57BL/6 x C3H)F1 | NFTs develop at 6 months | No association found between genetic mutation and tau pathology in AD patients<br>No amyloid pathology | 26,100,232 |

**Abbreviations:** NFT (Neurofibrillary Tangles); MAPT (Microtubule Associated Protein Tau); AD (Alzheimer's Disease)
